# Supplementary material for: Arterial and venous thromboembolism risk associated with blood eosinophils: A systematic review and meta‐analysis
Source: PubMed Central journal article supplement — Animal Model Exp Med. 2022 Oct 7;5(5):470–81. doi: 10.1002/ame2.12277 (PMC9610140; doi:10.1002/ame2.12277), 2022-10-07
Supplement: AME2-5-470-s002.pdf [file AME2-5-470-s002.pdf]

## Supplementary table 1

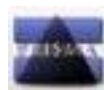

### PRISMA 2020 Checklist

| Section/topic           | Item No | Checklist item                                                                                                                                                                                                                                                                                       | Reported on Page Number/Line Number | Reported on Section/Paragraph |
|-------------------------|---------|------------------------------------------------------------------------------------------------------------------------------------------------------------------------------------------------------------------------------------------------------------------------------------------------------|-------------------------------------|-------------------------------|
| <b>TITLE</b>            |         |                                                                                                                                                                                                                                                                                                      |                                     |                               |
| Title                   | 1       | Identify the report as a systematic review.                                                                                                                                                                                                                                                          | Page1, Lines 2-3                    | Ttitle                        |
| <b>ABSTRACT</b>         |         |                                                                                                                                                                                                                                                                                                      |                                     |                               |
| Abstract                | 2       | See the PRISMA 2020 for Abstracts checklist (Table 2).                                                                                                                                                                                                                                               | Pages 4-5, Lines 52-74              | Abstract                      |
| <b>INTRODUCTION</b>     |         |                                                                                                                                                                                                                                                                                                      |                                     |                               |
| Rationale               | 3       | Describe the rationale for the review in the context of existing knowledge.                                                                                                                                                                                                                          | Page 6, lines 78-97                 | Introduction/paragraph1-2     |
| Objectives              | 4       | Provide an explicit statement of the objective(s) or question(s) the review addresses.                                                                                                                                                                                                               | Pages 6-7, lines 98-104             | Introduction/paragraph3       |
| <b>METHODS</b>          |         |                                                                                                                                                                                                                                                                                                      |                                     |                               |
| Eligibility criteria    | 5       | Specify the inclusion and exclusion criteria for the review and how studies were grouped for the syntheses.                                                                                                                                                                                          | page8, lines 122-136                | METHOD/paraphagph3            |
| Information sources     | 6       | Specify all databases, registers, websites, organisations, reference lists and other sources searched or consulted to identify studies. Specify the date when each source was last searched or consulted.                                                                                            | pages 7-8, lines 106-120            | Method/paragraphs 1-2         |
| Search strategy         | 7       | Present the full search strategies for all databases, registers and websites, including any filters and limits used.                                                                                                                                                                                 | pages 7-8, line106-120              | Method/paragraphs 1-2         |
| Selection process       | 8       | Specify the methods used to decide whether a study met the inclusion criteria of the review, including how many reviewers screened each record and each report retrieved, whether they worked independently, and if applicable, details of automation tools used in the process.                     | pages 8-9, lines 138-141            | Method/paragraph 4            |
| Data collection process | 9       | Specify the methods used to collect data from reports, including how many reviewers collected data from each report, whether they worked independently, any processes for obtaining or confirming data from study investigators, and if applicable, details of automation tools used in the process. | pages 8-9, lines 138-141            | Method/paragraph 4            |
| Data items              | 10a     | List and define all outcomes for which data were sought. Specify whether all results that were compatible with each outcome domain in each study were sought (e.g. for all measures, time points, analyses), and if not, the methods used to decide which results to collect.                        | pages 8-9, Lines 138-141            | Method/paragraph4             |
|                         | 10b     | List and define all other variables for which data were sought (e.g. participant and intervention characteristics, funding sources). Describe any assumptions made about any missing or unclear information.                                                                                         | pages 8-9, Lines 138-141            | Method/paragraph 4            |

|                               |     |                                                                                                                                                                                                                                                                   |                            |                                     |
|-------------------------------|-----|-------------------------------------------------------------------------------------------------------------------------------------------------------------------------------------------------------------------------------------------------------------------|----------------------------|-------------------------------------|
| Study risk of bias assessment | 11  | Specify the methods used to assess risk of bias in the included studies, including details of the tool(s) used, how many reviewers assessed each study and whether they worked independently, and if applicable, details of automation tools used in the process. | pages 9-10, lines 149-159  | Method/paragraph 6                  |
| Effect measures               | 12  | Specify for each outcome the effect measure(s) (e.g. risk ratio, mean difference) used in the synthesis or presentation of results.                                                                                                                               | page9, lines 143-147       | Method/paragraph5                   |
| Synthesis methods             | 13a | Describe the processes used to decide which studies were eligible for each synthesis.                                                                                                                                                                             | page 10, lines 161-171     | Method/paragraph7                   |
|                               | 13b | Describe any methods required to prepare the data for presentation or synthesis, such as handling of missing summary statistics, or data conversions.                                                                                                             | page 10, lines 161-171     | Method/paragraph7                   |
|                               | 13c | Describe any methods used to tabulate or visually display results of individual studies and syntheses.                                                                                                                                                            | page 10, lines 161-171     | Method/paragraph7                   |
|                               | 13d | Describe any methods used to synthesize results and provide a rationale for the choice(s). If meta-analysis was performed, describe the model(s), method(s) to identify the presence and extent of statistical heterogeneity, and software package(s) used.       | page 10, lines 161-171     | Method/paragraph7                   |
|                               | 13e | Describe any methods used to explore possible causes of heterogeneity among study results.                                                                                                                                                                        | page 10, lines 161-171     | Method/paragraph7                   |
|                               | 13f | Describe any sensitivity analyses conducted to assess robustness of the synthesized results.                                                                                                                                                                      | NA                         | few studies were included           |
| Reporting bias assessment     | 14  | Describe any methods used to assess risk of bias due to missing results in a synthesis (arising from reporting biases).                                                                                                                                           | page10, lines 170-171      | Method/paragraph7                   |
| Certainty assessment          | 15  | Describe any methods used to assess certainty (or confidence) in the body of evidence for an outcome.                                                                                                                                                             | page10, line163-166        | Method/paragraph7                   |
| <b>RESULTS</b>                |     |                                                                                                                                                                                                                                                                   |                            |                                     |
| Study selection               | 16a | Describe the results of the search and selection process, from the number of records identified in the search to the number of studies included in the review, ideally using a flow diagram.                                                                      | pages 10-11, lines 174-184 | Result/paragraph1, Figure_1         |
|                               | 16b | Cite studies that met many but not all inclusion criteria ('near-misses') and explain why they were excluded.                                                                                                                                                     | pages 10-11, lines 174-184 | Result/paragraph1, Figure_1         |
| Study characteristics         | 17  | Cite each included study and present its characteristics.                                                                                                                                                                                                         | pages 10-11, lines 174-184 | Result/paragraph2, Figure_1 Table 1 |
| Risk of bias in studies       | 18  | Present assessments of risk of bias for each included study.                                                                                                                                                                                                      | page 11, lines 186-191     | Result/Supplementary tables 2-4     |
| Results of individual studies | 19  | For all outcomes, present, for each study: (a) summary statistics for each group (where appropriate) and (b) an effect estimate and its precision (e.g. confidence/credible interval), ideally using structured tables or plots.                                  | pages 11-14, lines 193-259 | Result/paragraphs 3-7               |

|                                                |     |                                                                                                                                                                                                                                                                                      |                            |                                                        |
|------------------------------------------------|-----|--------------------------------------------------------------------------------------------------------------------------------------------------------------------------------------------------------------------------------------------------------------------------------------|----------------------------|--------------------------------------------------------|
| Results of syntheses                           | 20a | For each synthesis, briefly summarise the characteristics and risk of bias among contributing studies.                                                                                                                                                                               | pages 11-14, lines 193-259 | Result/paragraphs 3-7                                  |
|                                                | 20b | Present results of all statistical syntheses conducted. If meta-analysis was done, present for each the summary estimate and its precision (e.g. confidence/credible interval) and measures of statistical heterogeneity. If comparing groups, describe the direction of the effect. | pages 11-14, lines 193-259 | Result/paragraphs 3-7                                  |
|                                                | 20c | Present results of all investigations of possible causes of heterogeneity among study results.                                                                                                                                                                                       | pages 11-14, lines 193-259 | Result/paragraphs 3-7                                  |
|                                                | 20d | Present results of all sensitivity analyses conducted to assess the robustness of the synthesized results.                                                                                                                                                                           | pages 11-14, lines 193-259 | Result/paragraphs 3-7                                  |
| Reporting biases                               | 21  | Present assessments of risk of bias due to missing results (arising from reporting biases) for each synthesis assessed.                                                                                                                                                              | page 11, lines 186-191     | Result/Supplementary tables 2-4                        |
| Certainty of evidence                          | 22  | Present assessments of certainty (or confidence) in the body of evidence for each outcome assessed.                                                                                                                                                                                  | page 11, lines 186-191     | Result/Supplementary tables 2-4                        |
| <b>DISCUSSION</b>                              |     |                                                                                                                                                                                                                                                                                      |                            |                                                        |
| Discussion                                     | 23a | Provide a general interpretation of the results in the context of other evidence.                                                                                                                                                                                                    | pages 14-20, line 261-375  | Discussion/paragraphs 1-11                             |
|                                                | 23b | Discuss any limitations of the evidence included in the review.                                                                                                                                                                                                                      | pages 20-21, lines 377-394 | Limitation/paragraph1                                  |
|                                                | 23c | Discuss any limitations of the review processes used.                                                                                                                                                                                                                                | pages 20-21, lines 377-394 | Limitation/paragraph1                                  |
|                                                | 23d | Discuss implications of the results for practice, policy, and future research.                                                                                                                                                                                                       | page 21, lines 396-309     | Clinical implications and future directions/paragraph1 |
| <b>OTHER INFORMATION</b>                       |     |                                                                                                                                                                                                                                                                                      |                            |                                                        |
| Registration and protocol                      | 24a | Provide registration information for the review, including register name and registration number, or state that the review was not registered.                                                                                                                                       | page7, lines 106-110       | Methods/paragraph1                                     |
|                                                | 24b | Indicate where the review protocol can be accessed, or state that a protocol was not prepared.                                                                                                                                                                                       | page7, lines 106-110       | Methods/paragraph1                                     |
|                                                | 24c | Describe and explain any amendments to information provided at registration or in the protocol.                                                                                                                                                                                      | NA                         | NA                                                     |
| Support                                        | 25  | Describe sources of financial or non-financial support for the review, and the role of the funders or sponsors in the review.                                                                                                                                                        | page3, lines 42-46         | Funding statement                                      |
| Competing interests                            | 26  | Declare any competing interests of review authors.                                                                                                                                                                                                                                   | pages 3, 23, lines 49, 426 | Conflict of Interest Statement                         |
| Availability of data, code and other materials | 27  | Report which of the following are publicly available and where they can be found: template data collection forms; data extracted from included studies; data used for all analyses; analytic code; any other materials used in the review.                                           | page3, lines 39-40         | Data availability statement                            |

## PRISMA 2020 for Abstracts checklist

| Section/topic           | Item No | Checklist item                                                                                                                                                                                                                                                                                        | Reported on Page Number/Line Number | Reported on Section/Paragraph |
|-------------------------|---------|-------------------------------------------------------------------------------------------------------------------------------------------------------------------------------------------------------------------------------------------------------------------------------------------------------|-------------------------------------|-------------------------------|
| <b>TITLE</b>            |         |                                                                                                                                                                                                                                                                                                       |                                     |                               |
| Title                   | 1       | Identify the report as a systematic review.                                                                                                                                                                                                                                                           | page 1, lines 2-3                   | Abstract                      |
| <b>BACKGROUND</b>       |         |                                                                                                                                                                                                                                                                                                       |                                     |                               |
| Objectives              | 2       | Provide an explicit statement of the main objective(s) or question(s) the review addresses.                                                                                                                                                                                                           | page 3, lines 52-54                 | Abstract                      |
| <b>METHODS</b>          |         |                                                                                                                                                                                                                                                                                                       |                                     |                               |
| Eligibility criteria    | 3       | Specify the inclusion and exclusion criteria for the review.                                                                                                                                                                                                                                          | page 3, lines 54-58                 | Abstract                      |
| Information sources     | 4       | Specify the information sources (e.g. databases, registers) used to identify studies and the date when each was last searched.                                                                                                                                                                        | page 3, lines 54-58                 | Abstract                      |
| Risk of bias            | 5       | Specify the methods used to assess risk of bias in the included studies.                                                                                                                                                                                                                              | NA                                  | NA                            |
| Synthesis of results    | 6       | Specify the methods used to present and synthesize results.                                                                                                                                                                                                                                           | page 3, lines 56-58                 | Abstract                      |
| <b>RESULTS</b>          |         |                                                                                                                                                                                                                                                                                                       |                                     |                               |
| Included studies        | 7       | Give the total number of included studies and participants and summarise relevant characteristics of studies.                                                                                                                                                                                         | page 3, lines 58                    | Abstract                      |
| Synthesis of results    | 8       | Present results for main outcomes, preferably indicating the number of included studies and participants for each. If meta-analysis was done, report the summary estimate and confidence/credible interval. If comparing groups, indicate the direction of the effect (i.e. which group is favoured). | page 3, lines 58-65                 | Abstract                      |
| <b>DISCUSSION</b>       |         |                                                                                                                                                                                                                                                                                                       |                                     |                               |
| Limitations of evidence | 9       | Provide a brief summary of the limitations of the evidence included in the review (e.g. study risk of bias, inconsistency and imprecision).                                                                                                                                                           | NA                                  | NA                            |
| Interpretation          | 10      | Provide a general interpretation of the results and important implications.                                                                                                                                                                                                                           | pages 3-4, lines 65-74              | Abstract                      |
| <b>OTHER</b>            |         |                                                                                                                                                                                                                                                                                                       |                                     |                               |
| Funding                 | 11      | Specify the primary source of funding for the review.                                                                                                                                                                                                                                                 | page3, lines 42-46                  | Funding statement             |
| Registration            | 12      | Provide the register name and registration number.                                                                                                                                                                                                                                                    | page7, lines 106-110                | Methods/paragraph1            |

Please leave this space alone as it will be supplemented by the editorial office when needed.
