# Supplementary material for: Arterial and venous thromboembolism risk associated with blood eosinophils: A systematic review and meta‐analysis
Source: PubMed Central journal article supplement — Animal Model Exp Med. 2022 Oct 7;5(5):470–81. doi: 10.1002/ame2.12277 (PMC9610140; doi:10.1002/ame2.12277), 2022-10-07
Supplement: AME2-5-470-s004.pdf [file AME2-5-470-s004.pdf]

**Supplementary table 3**

**NEWCASTLE - OTTAWA QUALITY ASSESSMENT SCALE CASE CONTROL STUDIES**

| Study                |                                                                            | Monica Verdoia<br>2014 | Monica Verdoia<br>2015 | Serdar Kocoglu<br>2013 |
|----------------------|----------------------------------------------------------------------------|------------------------|------------------------|------------------------|
| <b>Selection</b>     | Is the case definition adequate                                            | ☆                      | ☆                      | ☆                      |
|                      | Representativeness of the cases                                            | ☆                      | ☆                      | ☆                      |
|                      | Selection of Controls                                                      | —                      | —                      | —                      |
|                      | Definition of Controls                                                     | —                      | —                      | ☆                      |
| <b>Comparability</b> | Comparability of cases and controls on the basis of the design or analysis | ☆☆                     | ☆☆                     | ☆☆                     |
| <b>Exposure</b>      | Ascertainment of exposure                                                  | ☆☆                     | ☆☆                     | ☆                      |
|                      | Same method of ascertainment for cases and controls                        | ☆                      | ☆                      | ☆☆                     |
|                      | Non-Response rate                                                          | —                      | —                      | —                      |
| <b>Score</b>         |                                                                            | <b>7</b>               | <b>7</b>               | <b>8</b>               |

**NEWCASTLE - OTTAWA QUALITY ASSESSMENT SCALE CASE CONTROL STUDIES**

Note: A study can be awarded a maximum of one star for each numbered item within the Selection and Exposure categories. A maximum of two stars can be given for Comparability.

**Selection**

- 1) Is the case definition adequate?
  - a) yes, with independent validation ☆
  - b) yes, eg record linkage or based on self reports
  - c) no description
- 2) Representativeness of the cases
  - a) consecutive or obviously representative series of cases ☆
  - b) potential for selection biases or not stated
- 3) Selection of Controls
  - a) community controls ☆
  - b) hospital controls
  - c) no description
- 4) Definition of Controls
  - a) no history of disease (endpoint) ☆
  - b) no description of source

**Comparability**

- 1) Comparability of cases and controls on the basis of the design or analysis
  - a) study controls for \_\_\_\_\_ (Select the most important factor.) ☆
  - b) study controls for any additional factor ☆ (This criterion could be modified to indicate specific control for a second important factor.)

## **Exposure**

### 1) Ascertainment of exposure

- a) secure record (eg surgical records) ☆
- b) structured interview where blind to case/control status ☆
- c) interview not blinded to case/control status
- d) written self-report or medical record only
- e) no description

### 2) Same method of ascertainment for cases and controls

- a) yes ☆
- b) no

### 3) Non-Response rate

- a) same rate for both groups ☆
- b) non respondents described
- c) rate different and no designation
